# Supplementary material for: Electrophilic (Li+) acceleration of C–H reductive elimination and oxidative addition reactions of Os(II)/Os(0) nitrosyl complexesElectronic supplementary information (ESI) available: full experimental and computational details. See http://www.rsc.org/suppdata/nj/b2/b200180m/
Source: Royal Society of Chemistry journal article supplement (doi:10.1039/b200180m), 2002-04-18
Supplement: b200180m.doc [file b200180m.doc]

Supporting Information for

**Electrophilic (Li+) Acceleration of C-H Reductive Elimination and Oxidative Addition Reactions of Os(II)/Os(0) Complexes**

**Dmitry V. Yandulov and Kenneth G. Caulton***

Department of Chemistry, Indiana University, Bloomington, IN 47405-4001, USA; email: caulton@indiana.edu

**Experimental.**

**General.** All manipulations were carried out using standard Schlenk and glovebox techniques under argon. Regular and deuterated solvents were purified by appropriate methods, distilled under Ar and stored in gas-tight solvent bulbs with Teflon closures. **1-Me** was prepared according to the published procedures[[1]](#endnote-2). 1H and 31P NMR spectra were recorded on a Varian Gemini 2000 (1H: 300 MHz; 31P: 122 MHz) or a Varian Inova 400 (1H: 400 MHz; 31P: 162 MHz) spectrometers and referenced to the residual protio solvent peaks (1H) or external 85% H3PO4 (31P). Chemical shifts are reported in ppm relative to tetramethylsilane (1H), and 85% H3PO4 (31P). Infrared spectra were recorded on a Nicolet 510P FT-IR spectrometer. Elemental analyses were performed on a Perkin-Elmer 2400 CHNS/O Elemental Analyzer at Indiana University. Numerical data analyses were done with Matlab[[2]](#endnote-3). Standard error propagation formulae[[3]](#endnote-4) were utilized in the error analyses.

***cis*,*trans*-Os(H)2Ph(NO)(PiPr3)2 (1-Ph).** A solution of **1-Me** (100 mg, 179 mol) in benzene (3 mL) was heated at 60-65°C for 1 hr 40 min, filtered through Celite and brought to dryness. The residue was dried at 45°C/ca. 10 mTorr for 2 hrs and extracted with MeOH. The combined extracts were filtered and concentrated to yield orange crystals after cooling to -40°C for overnight, which were washed with 3×5 mL of MeOH at –40°C, dried in vacuo and stored under Ar at –20°C. Yield 73 mg (118 mol, 66%). 1H NMR (C6D6, 20°C):  7.91 (br. s, 2H, *o*-C6*H*5), 7.16 (approx. t, JH-H=6.8 Hz, 2H, *m*-C6*H*5), 6.99 (approx. t, JH-H=6.9 Hz, 1H, *p*-C6*H*5), 2.11 (m, 6H, P(C*H*(CH3)2)3), 1.09 (dvt, JH-H=7.3 Hz, N=14.6 Hz, 18H, P(CH(C*H*3)2)3), 1.03 (dvt, JH-H=7.3 Hz, N=14.6 Hz, 18H, P(CH(C*H*3)2)3), -5.99 (td, JP-H=25.4 Hz, JH-H=8.1 Hz, 1H, ON-Os*H*), -6.63 (td, JP-H=19.0 Hz, JH‑H=8.1 Hz, 1H, Ph-Os*H*). 31P{1H} NMR (C6D6, 20°C):  28.5 (s). IR (C6D6 ): 1690 cm-1 (vNO). Anal. Found (Calcd., %) for C24H49NOOsP2: C 46.25 (46.51), H 7.70 (7.97), N 2.18 (2.26). Selected shifts of hydride NMR signals on deuteration, measured on a mixture of **1-Ph** and **1-Ph-*d*,*d*5**; 1H NMR (C6D6, 20°C): (ON-Os(D)-*H*)-(ON-Os(H)-*H*)= ‑69.0 ppb, (Ph-Os(D)-*H*)-(Ph-Os(H)-*H*)= –1.0 ppb; 31P{1H} NMR (C6D6, 20°C): (ON-Os(D)-H)-(ON-Os(H)-H)=+63.0 ppb, t, JP-D=3 Hz; (Ph-Os(D)-H)-(Ph-Os(H)-H)= –30.0 ppb, t, JP‑D=4 Hz.

**Generation of 1-P~C.** NMR tube reaction of **1-OTf** with 1.5 equiv. of (Me3Si)2NLi×OEt2 in C6D12 at 25°C for 2 days gave the title compound as a mixture of major, referred to as **1-P~C**, and minor isomers, along with small traces of Os(H)3(NO)L2 and OsH(NO)L3. Selected 1H NMR (C6D12, 20°C):  -4.25 (m, 2H, Os(*H*)2, major), -7.7 (br. td, 1H, Os*H*, minor), -9.7 (br. td, 1H, Os*H*, minor). 31P{1H} NMR (C6D12, 20°C): AB, (A)=38.3, (B)= -8.7, JA-B=230 Hz (major); AB, (A)=36.4, (B)= -0.7, JA-B=202 Hz (minor); all signals acquire additional triplet splitting with selective 1H decoupling.

**IR Measurements.** In an argon-filled glovebox an appropriate amount of heptane, measured with a microliter syringe, was added to the mixture of solid reagents in an oven-dried vial equipped with a stirbar. IR spectra were recorded on homogeneous solutions within 5 min.

**Kinetic Measurements.** Samples of 29.9 mM total Os concentration were prepared in an Ar-filled glovebox by adding an appropriate amount of solvent, measured with a microliter syringe, to carefully weighted solids placed in a flame-dried 5 mm NMR tube fitted with a Teflon stopcock, transferred in a preheated NMR probe within 5-10 min and were allowed to equilibrate for 10 min at a given temperature before the start of acquisition. Probe temperatures were determined by ethylene glycol calibration before and after each run and were consistent to well within the assumed 0.5° error limit. Time evolution of concentrations of **1-Me**, **1-P~C** and **1-Ph-*d*,*d*5**[[4]](#endnote-5) was quantitatively determined by using the absolute integrated intensities of the corresponding 1H NMR hydride signals; the three complexes accounted for all species present in a significant concentration during the course of the reaction. Although a slight decrease in the total signal intensity of the three species was typically observed, the mass balance was maintained well, with a standard deviation of the total intensity values not exceeding 4% of the mean, with a rare exception. The measured individual signal intensities were not normalized so as to strictly satisfy the mass balance condition in the subsequent fitting. 1H NMR spectra were acquired with 1, 4 or 8 scans with the total recycling time (at+d1) set to over five times the hydride T1 times, estimated from the data obtained on the trihydride Os(H)3(NO)(PiPr3)2[[5]](#endnote-6). The total acquisition time for individual spectra was kept within 9% of the total point duration, i.e. the sum of the total acquisition time and the preceding delay time.

In the steady-state approximation for the concentration of the unobserved **2**, *k*1·[**1‑Me**]+*k*‑2·[**1-P~C**]=[**2**]·(*k*2+*k*3´), the kinetic scheme shown in Scheme 1a gives the rate expressions:

d[**1-Me**]/d*t*=–*k*1·[**1-Me**]

d[**1-P~C**]/d*t*=[*k*1·*k*2/(*k*2+*k*3´)]·[**1-Me**]–[*k*3´·*k*-2/(*k*2+*k*3´)]·[**1-P~C**]*k*1·[**1-Me**]–*K*·*k*3´·[**1-P~C**]

d[**1-Ph-*d*,*d*5**]/d*t*=[*k*1·*k*3´/(*k*2+*k*3´)]·[**1-Me**]+[*k*3´·*k*-2/(*k*2+*k*3´)]·[**1-P~C**]*k*1·*k*3´/*k*2]·[**1-Me**]+*K*·*k*3´·[**1-P~C**]

which simplify as shown on the right with *k*2»*k*3´ (*K*=*k*-2/*k*2) and integrate as[[6]](#endnote-7):

[**1-Me**]=[**1-Me**]0·*e*(-*k*1·*t*)

[**1-P~C**]=[**1-Me**]0·[*k*1/(*K*·*k*3´-*k*1)]·[*e*(-*k*1·*t*)–*e*(-*K*·*k*3´·*t*)]

[**1-Ph-*d*,*d*5**]=[**1-Me**]0·[1–{*K*·*k*3´/(*K*·*k*3´-*k*1)}·*e*(-*k*1·*t*)+{*k*1/(*K*·*k*3´-*k*1)}·*e*(-*K*·*k*3´·*t*)]

Exponential least-squares fit of the decay of **1-Me** gave the value of *k*1, which was kept fixed in the subsequent least-squares fitting of the evolution of [**1-P~C**] and [**1-Ph-*d*,*d*5**] according to the above integrated rate expressions. The latter fitting additionally allowed for a variable dead time elapsed from the actual start of the reaction, i.e. the time of [**1-P~C**]=[**1-Ph-*d*,*d*5**]=0, and the first point of the series, and gave the effective *k*4´=*K*·*k*3´. The value of the neat C6D6 concentration of 11.29 M was used in the conversion of the pseudo-first order *k*4´ to second-order *k*4=*k*4´/[C6D6]. The error analyses of the activation parameters obtained from Eyring plots of *k*1 and *k*4 assumed 10% and 20% errors in the respective rate constants and 0.5° error in temperature.

**Computational Details.** All calculations were performed with Gaussian 98[[7]](#endnote-8) suites of programs, using hybrid density functional method B3LYP[[8]](#endnote-9), with LANL2DZ[[9]](#endnote-10), a valence double- basis set with relativistic effective core potentials for OsError: Reference source not foundb and PError: Reference source not foundc centers, augmented with polarization functions on (Os)H (exponent 1.0), C (0.75), N (0.80), O (0.85), F(0.90), Os(0.886)[[10]](#endnote-11) and P (0.387)Error: Reference source not found. All structures were fully optimized with standard convergence criteria without symmetry constraints and all were confirmed to be real minima or transition states via frequency analysis, which was also used to calculate zero-point energies (ZPE) without scaling. For all transition states, motion corresponding to the imaginary frequency was visually checked.

# References

1. (?) Yandulov, D. V.; Huffman, J. C.; Caulton, K. G. *New J. Chem.* **2000**, *24*, 649. [↑](#endnote-ref-2)
2. (?) *MATLAB*, version 5.3.0.10183 (R11); The MathWorks, Inc.: Natick, MA, copyright 1984-1999. [↑](#endnote-ref-3)
3. (?) Bevington, P.R. *Data Reduction and Error Analysis for the Physical Sciences*; McGraw-Hill Book Company: New York, 1969; Chapter 4. [↑](#endnote-ref-4)
4. (?) Intramolecular hydride site exchange results in a slow partial transfer of the protio hydride ligand from the original site cis to NO to the site trans to NO during the course of the reaction in the temperature range studied, and both hydride signals were integrated. [↑](#endnote-ref-5)
5. (?) Yandulov, D. V.; Huang, D.; Huffman, J. C.; Caulton, K. G. *Inorg. Chem.* **2000**, *39*, 1919. [↑](#endnote-ref-6)
6. (?) Wilkins, R. G. *Kinetics and Mechanism of Reactions of Transition Metal Complexes*; VCH: New York, NY; p. 19. [↑](#endnote-ref-7)
7. (?) Frisch, M. J.; Trucks, G. W.; Schlegel, H. B.; Scuseria, G. E.; Robb, M. A.; Cheeseman, J. R.; Zakrzewski, V. G.; Montgomery, J. A., Jr.; Stratmann, R. E.; Burant, J. C.; Dapprich, S.; Millam, J. M.; Daniels, A. D.; Kudin, K. N.; Strain, M. C.; Farkas, O.; Tomasi, J.; Barone, V.; Cossi, M.; Cammi, R.; Mennucci, B.; Pomelli, C.; Adamo, C.; Clifford, S.; Ochterski, J.; Petersson, G. A.; Ayala, P. Y.; Cui, Q.; Morokuma, K.; Malick, D. K.; Rabuck, A. D.; Raghavachari, K.; Foresman, J. B.; Cioslowski, J.; Ortiz, J. V.; Stefanov, B. B.; Liu, G.; Liashenko, A.; Piskorz, P.; Komaromi, I.; Gomperts, R.; Martin, R. L.; Fox, D. J.; Keith, T.; Al-Laham, M. A.; Peng, C. Y.; Nanayakkara, A.; Gonzalez, C.; Challacombe, M.; Gill, P. M. W.; Johnson, B.; Chen, W.; Wong, M. W.; Andres, J. L.; Gonzalez, C.; Head-Gordon, M.; Replogle, E. S.; Pople, J. A. *Gaussian 98*, *Revision A.6*; Gaussian, Inc.: Pittsburgh PA, 1998. [↑](#endnote-ref-8)
8. (?) Becke, A. D. *J. Chem. Phys.* **1993**, *98*, 5648. Lee, C.; Yang, W.; Parr, R. G. *Phys. Rev. B* **1988**, *37*, 785. Stephens, P. J.; Devlin, F. J.; Chabalowski, C. F.; Frisch, M. J. *J. Phys. Chem.* **1994**, *98*, 11623. [↑](#endnote-ref-9)
9. (?) (a) Dunning, T. H., Jr.; Hay, P. J. in *Modern Theoretical Chemistry*, Schaefer, H. F., III, Ed.; Plenum: New York, 1976; pp. 1-28. (b) Hay, P. J.; Wadt, W. R. *J. Chem. Phys.* **1985**, *82*, 299. (c) Wadt, W. R.; Hay, P. J. *J. Chem. Phys.* **1985**, *82*, 284. [↑](#endnote-ref-10)
10. (?) Höllwarth, A.; Böhme, M.; Dapprich, S.; Ehlers, A. W.; Gobbi, A.; Jonas, V.; Köhler, K. F.; Stegmann, R.; Veldkamp, A.; Frenking, G. *Chem. Phys. Lett.* **1993**, *208*, 237. [↑](#endnote-ref-11)
